# Supplementary material
Source: bioRxiv or medRxiv preprint supplement (https://www.biorxiv.org/content/biorxiv/early/2020/12/11/2020.12.09.415034.1/DC1/embed/media-1.pdf)

**Table S1.** Pairwise comparisons of meta-analytic activation maps across prosocial categories.

| <b>Cooperation &gt; Equity</b>                           |                         |              |          |               |                   |                   |                   |
|----------------------------------------------------------|-------------------------|--------------|----------|---------------|-------------------|-------------------|-------------------|
| <b>Region</b>                                            | <b>Brodman<br/>Area</b> | <b>SDM-Z</b> | <b>P</b> | <b>Voxels</b> | <b>MNI-<br/>x</b> | <b>MNI-<br/>y</b> | <b>MNI-<br/>z</b> |
| Inferior frontal gyrus, ventrolateral (L)                | 6                       | 3.429        | 0.000202 | 91            | -54               | 2                 | 14                |
| Supplementary motor area (L)                             | 6                       | 3.297        | 0.000366 | 199           | -4                | -4                | 68                |
| Precentral gyrus (L)                                     | 6                       | 3.685        | 0.000061 | 31            | -44               | -8                | 60                |
| Hippocampus (L)                                          |                         | 3.037        | 0.001108 | 19            | -14               | -12               | -14               |
| Caudate nucleus (R)                                      |                         | 3.4          | 0.000231 | 27            | 18                | -12               | 24                |
| Thalamus (L, R)                                          |                         | 3.393        | 0.000239 | 139           | 0                 | -22               | 6                 |
| Thalamus (L)                                             |                         | 3.669        | 0.000067 | 152           | -20               | -28               | 8                 |
| Cerebellum lobule IV / V extending to fusiform gyrus (R) | 20                      | 2.825        | 0.002578 | 10            | 28                | -30               | -26               |
| Ventral tegmental area (L)                               |                         | 3.371        | 0.000264 | 144           | -8                | -30               | -26               |
| Supramarginal gyrus (L)                                  | 48                      | 2.874        | 0.002123 | 22            | -62               | -32               | 24                |
| Lingual gyrus (R)                                        | 27                      | 2.975        | 0.001423 | 16            | 16                | -42               | -6                |
| Supramarginal gyrus (L)                                  | 48                      | 2.927        | 0.001731 | 19            | -54               | -42               | 28                |
| Fusiform gyrus (L)                                       | 37                      | 3.217        | 0.000518 | 22            | -40               | -48               | -12               |
| Superior parietal gyrus (L)                              | 5                       | 4.157        | 0.000005 | 619           | -18               | -50               | 60                |
| Posterior cingulate cortex, ventral (R)                  | 23                      | 3.421        | 0.000211 | 17            | 30                | -62               | 8                 |
| Cuneus (L)                                               | 19                      | 3.574        | 0.000105 | 57            | -42               | -62               | 6                 |
| <b>Equity &gt; Altruism</b>                              |                         |              |          |               |                   |                   |                   |
| <b>Region</b>                                            | <b>Brodman<br/>Area</b> | <b>SDM-Z</b> | <b>P</b> | <b>Voxels</b> | <b>MNI-<br/>x</b> | <b>MNI-<br/>y</b> | <b>MNI-<br/>z</b> |
| Inferior frontal gyrus, triangular part (R)              | 45                      | -2.867       | 0.000067 | 376           | 48                | 36                | 6                 |
| Inferior frontal gyrus extending to insula (R)           | 6                       | -2.726       | 0.000132 | 305           | 48                | -6                | 6                 |
| Superior temporal gyrus (R)                              | 20                      | -2.3         | 0.000895 | 37            | 48                | -10               | -14               |
| Posterior insula (L)                                     | 48                      | -2.802       | 0.000092 | 70            | -38               | -14               | 6                 |
| Superior temporal gyrus (R)                              | 21                      | -2.556       | 0.000292 | 77            | 58                | -22               | -6                |

|                            |    |        |          |    |     |     |     |
|----------------------------|----|--------|----------|----|-----|-----|-----|
| Middle occipital gyrus (R) | 39 | -2.373 | 0.000654 | 29 | 42  | -72 | 26  |
| Cerebellum, crus I (L)     |    | -2.316 | 0.000832 | 17 | -22 | -80 | -30 |
| Middle occipital gyrus (L) | 19 | -2.215 | 0.001272 | 16 | -34 | -84 | 30  |

---

### Altruism > Equity

| Region                                                 | Brodman<br>Area | SDM-Z | P        | Voxels | MNI-<br>x | MNI-<br>y | MNI-<br>z |
|--------------------------------------------------------|-----------------|-------|----------|--------|-----------|-----------|-----------|
| Superior frontal gyrus, dorsolateral (L)               | 9               | 2.863 | 0.000466 | 17     | -20       | 42        | 44        |
| Anterior cingulate extending to paracingulate gyri (R) | 32              | 2.446 | 0.002611 | 13     | 10        | 36        | 24        |
| Middle cingulate extending to paracingulate gyri (R)   | 24              | 2.905 | 0.000385 | 187    | -2        | 22        | 36        |
| Superior frontal gyrus, dorsolateral (L)               | 9               | 2.794 | 0.000625 | 32     | -36       | 22        | 32        |
| Anterior insula (L)                                    | 48              | 2.596 | 0.001440 | 24     | -30       | 18        | 10        |
| Supplementary motor area (R)                           | 8               | 2.435 | 0.002725 | 23     | 12        | 16        | 62        |
| Anterior insula (L)                                    | 48              | 2.63  | 0.001253 | 11     | -34       | 12        | -14       |
| Supplementary motor area (L)                           | 6               | 2.977 | 0.000280 | 138    | -6        | 6         | 68        |
| Superior middle gyrus, dorsolateral (L)                | 6               | 2.664 | 0.001092 | 108    | -48       | 2         | 26        |
| Precentral gyrus (L)                                   | 6               | 2.387 | 0.003274 | 11     | -42       | 0         | 54        |
| Caudate nucleus (R)                                    |                 | 3.492 | 0.000022 | 98     | 16        | -8        | 22        |
| Thalamus (L)                                           |                 | 2.573 | 0.001582 | 11     | -6        | -8        | 4         |
| Hippocampus (L)                                        |                 | 2.556 | 0.001701 | 12     | -18       | -12       | -14       |
| Pons (L)                                               |                 | 2.959 | 0.000304 | 125    | -10       | -24       | -14       |
| Thalamus (L)                                           |                 | 3.676 | 0.000009 | 365    | -14       | -30       | 14        |
| Fusiform gyrus (L)                                     | 37              | 2.648 | 0.001169 | 35     | -44       | -46       | -10       |

---

### Altruism > Cooperation

| Region                                   | Brodman<br>Area | SDM-Z | P        | Voxels | MNI-<br>x | MNI-<br>y | MNI-<br>z |
|------------------------------------------|-----------------|-------|----------|--------|-----------|-----------|-----------|
| Superior frontal gyrus, dorsolateral (L) | 10              | 2.489 | 0.000941 | 16     | -14       | 62        | 24        |

|                                          |      |       |          |    |     |     |    |
|------------------------------------------|------|-------|----------|----|-----|-----|----|
| Superior frontal gyrus, dorsolateral (L) | 8    | 2.537 | 0.000803 | 25 | -10 | 38  | 58 |
| Superior frontal gyrus, dorsolateral (L) | 9    | 2.198 | 0.002377 | 21 | -12 | 38  | 46 |
| Supplementary motor area (L)             | 8    | 2.322 | 0.001615 | 40 | -10 | 30  | 36 |
| Supplementary motor area (L)             | 6, 8 | 2.419 | 0.001180 | 18 | -10 | 24  | 66 |
| Middle temporal gyrus (L)                | 21   | 3.869 | 0.000005 | 62 | -66 | -32 | -8 |
| Lateral ventricle (L)                    |      | 2.727 | 0.000421 | 13 | -16 | -32 | 16 |
| Angular gyrus (L)                        | 39   | 2.574 | 0.000710 | 16 | -40 | -56 | 26 |
| Middle occipital gyrus (L)               | 18   | 2.131 | 0.002914 | 21 | -22 | -96 | 0  |

---

**Figure S1a.** [Cooperative>Selfish] > [Equitable>Selfish] meta-analytic contrast maps.

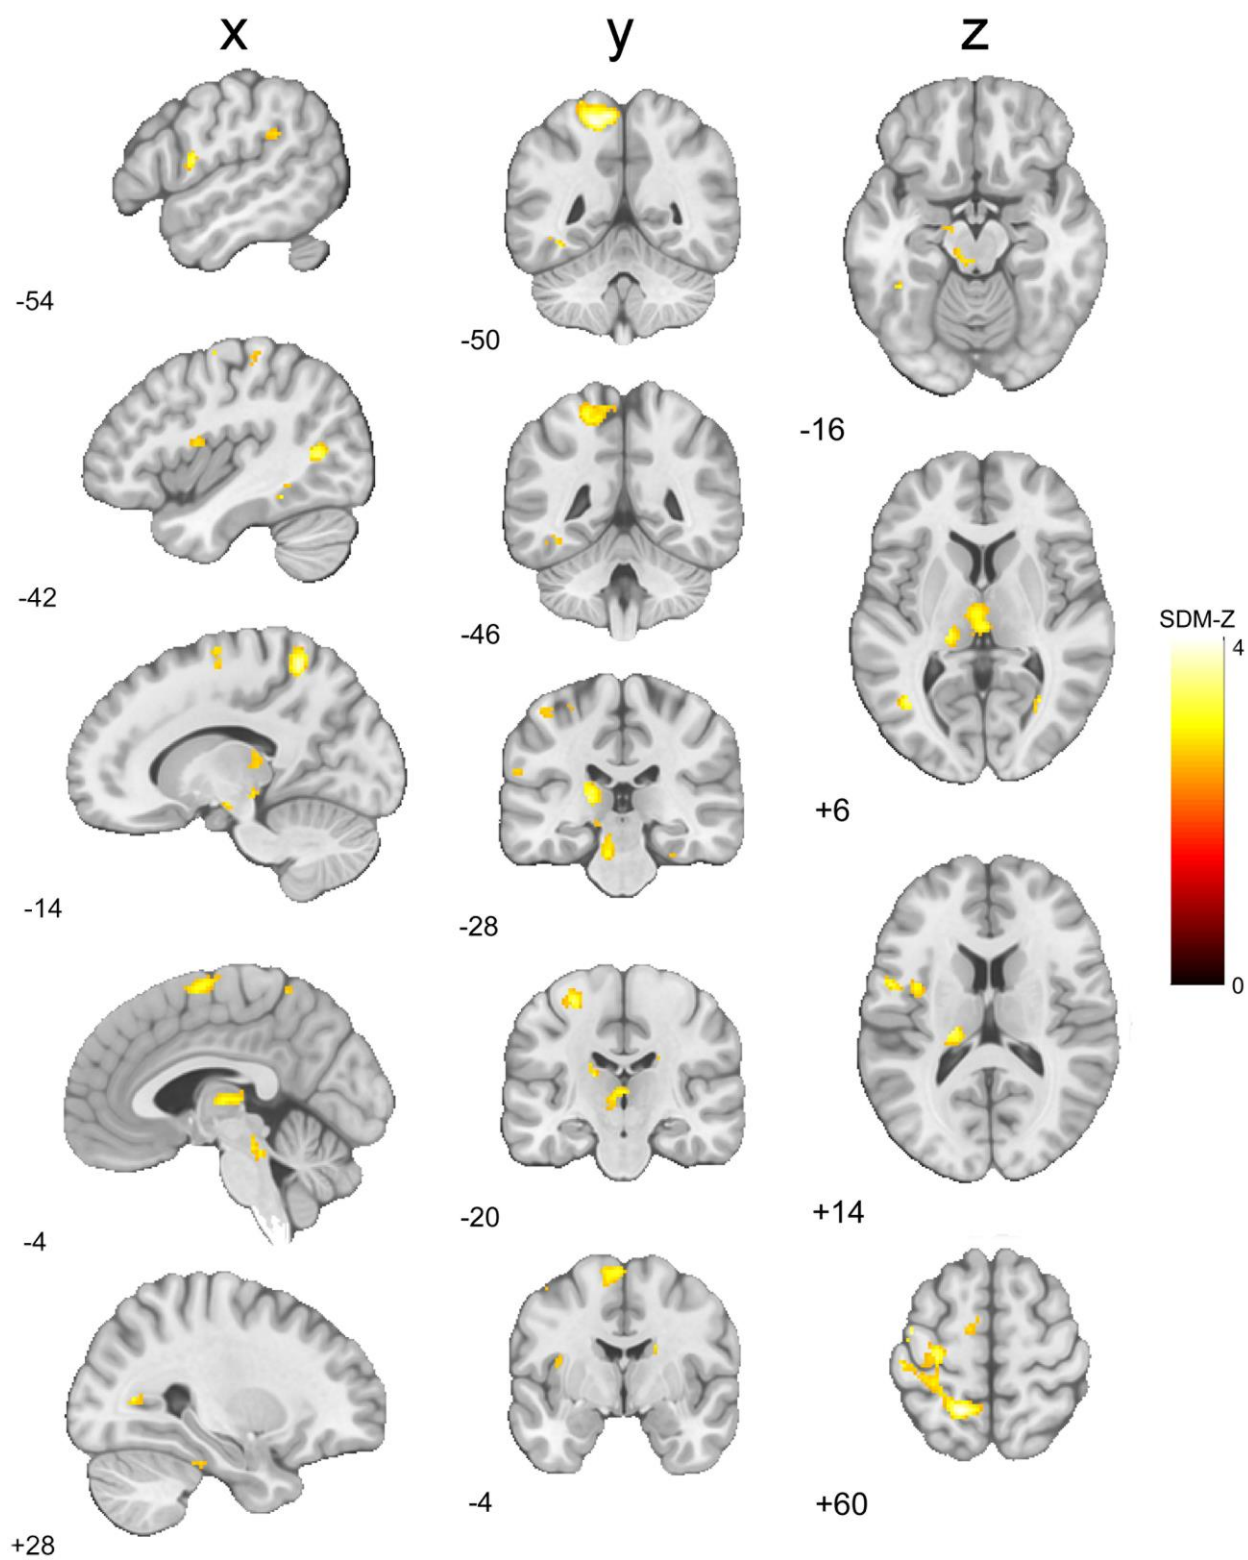

**Figure S1b.** [Equitable>Selfish] > [Altruistic>Selfish] meta-analytic contrast maps.

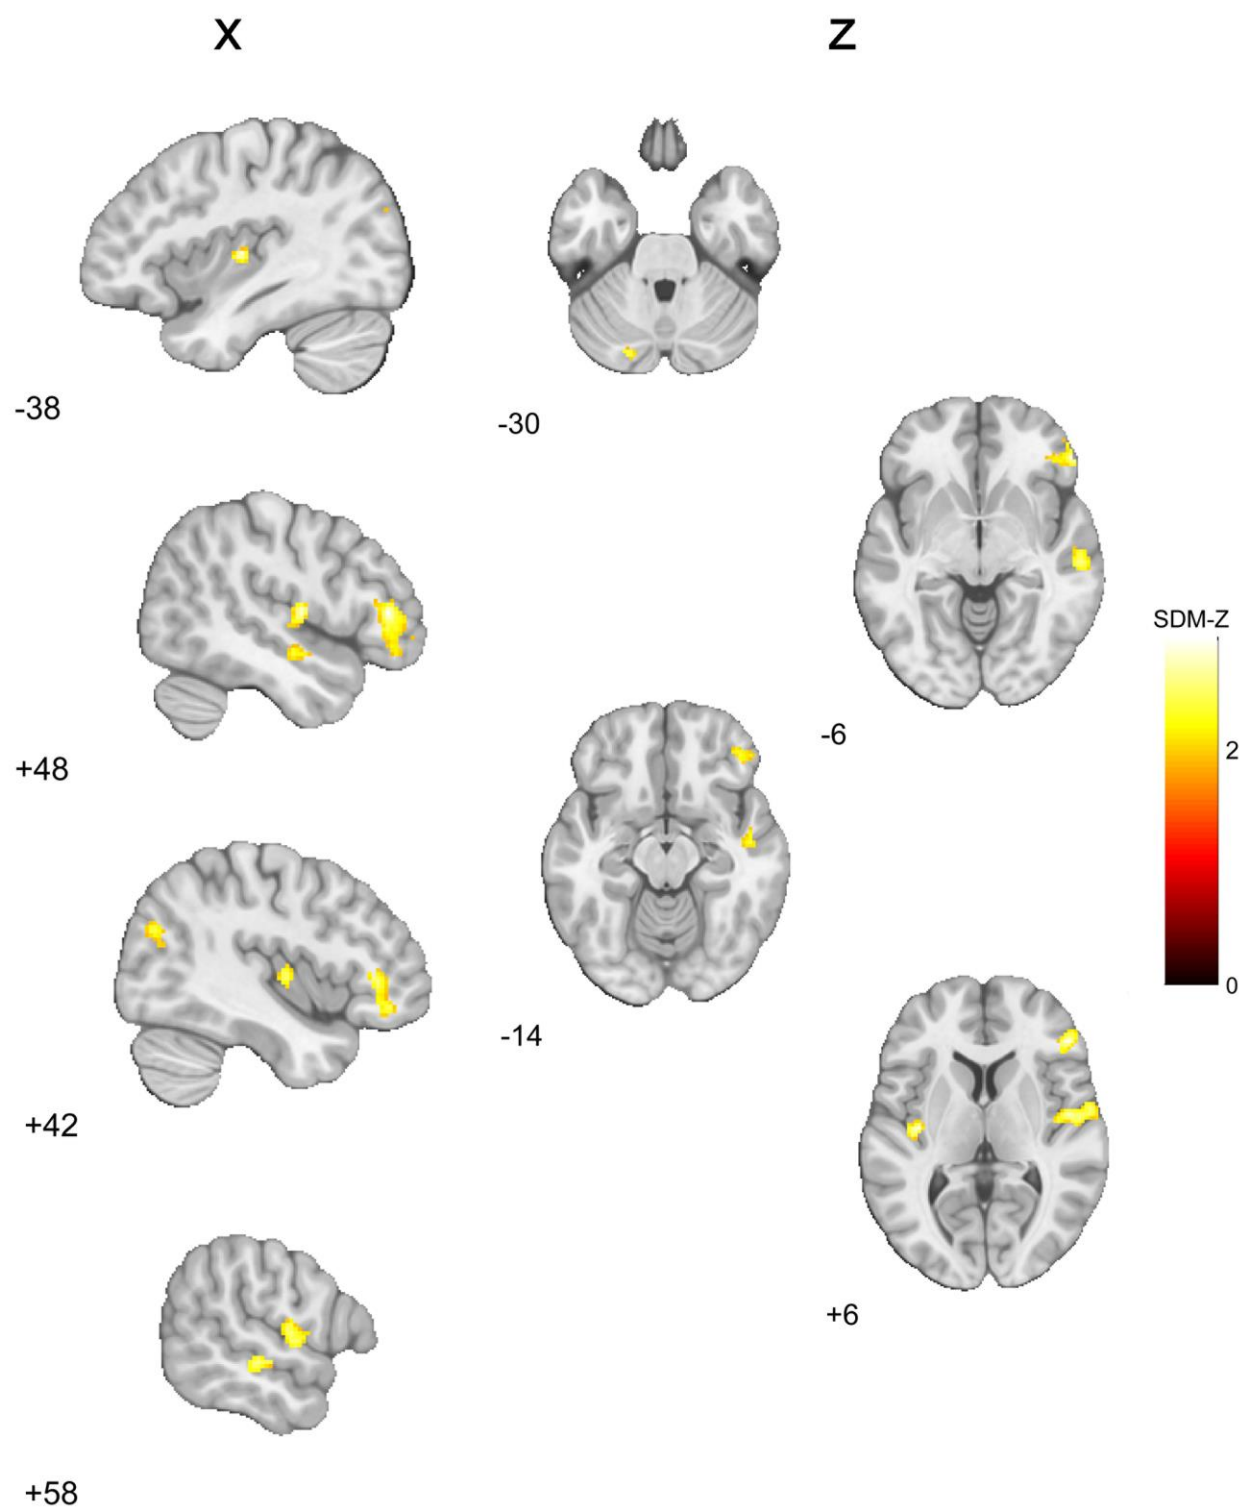

**Figure S1c.** [Altruistic>Selfish] > [Equitable>Selfish] meta-analytic contrast maps.

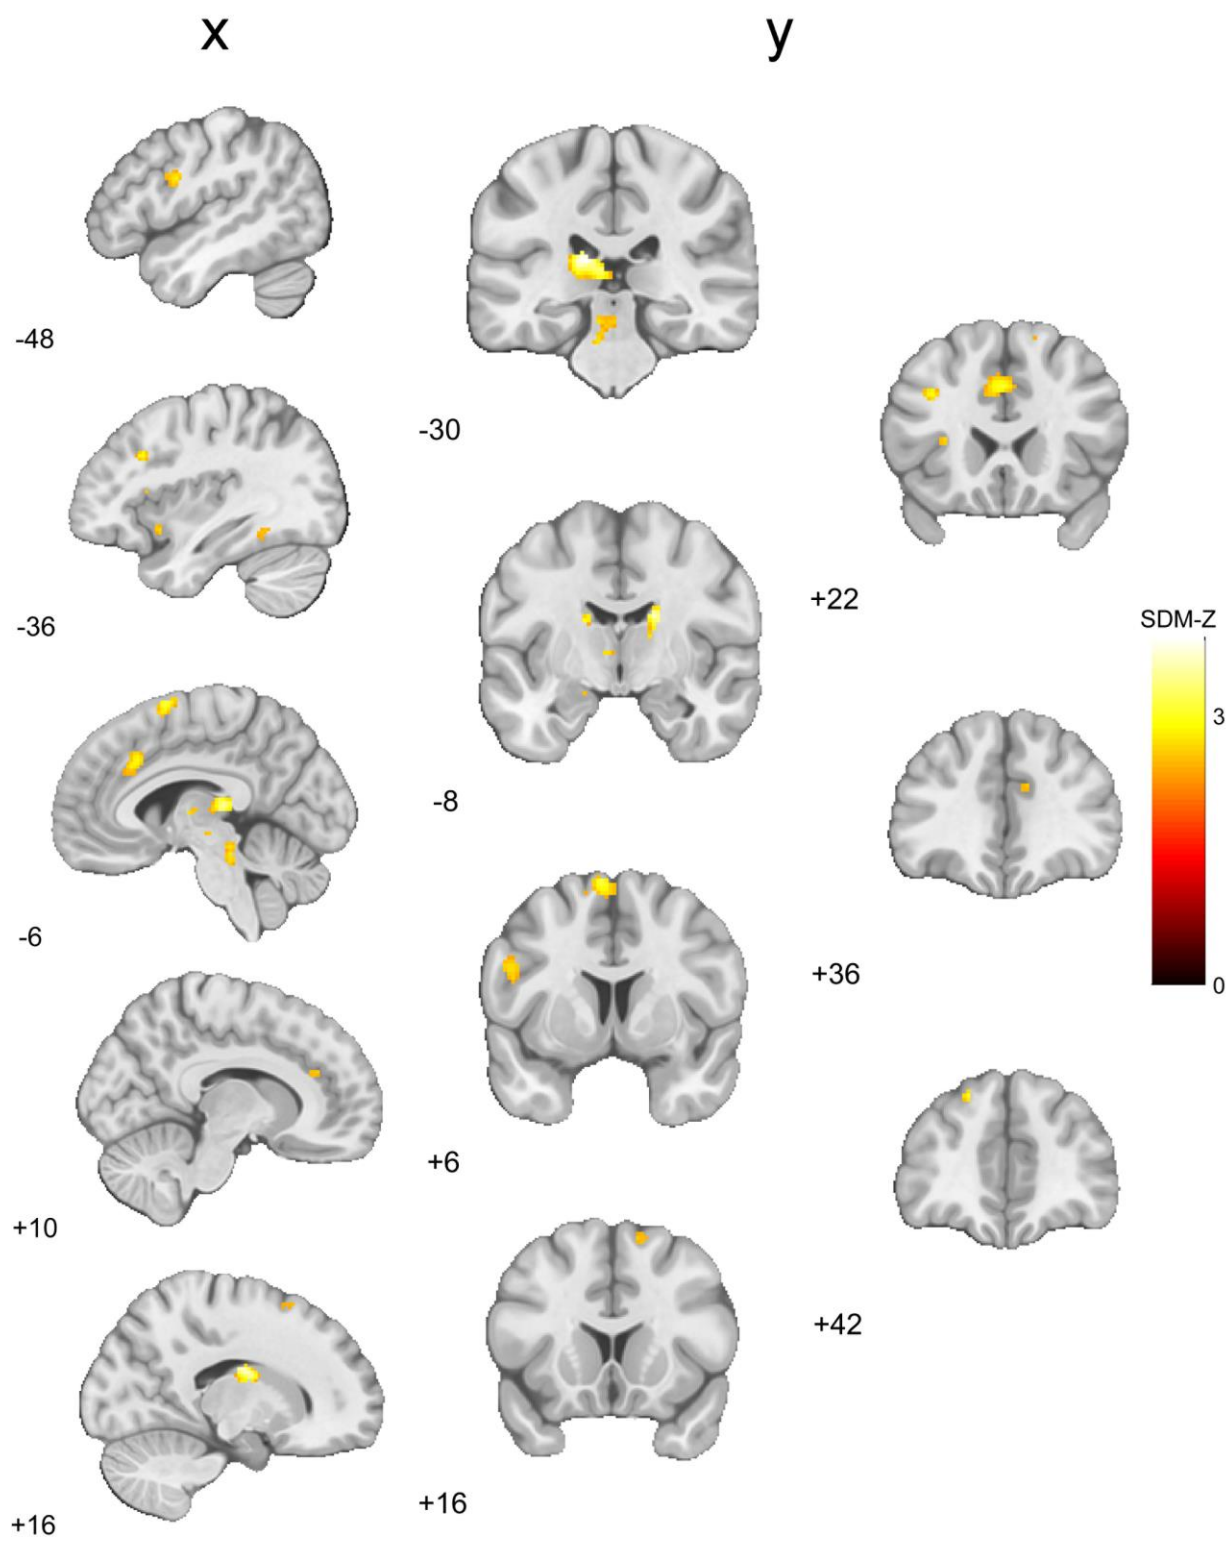

**Figure S1d.** [Altruistic>Selfish] > [Cooperative>Selfish] meta-analytic contrast maps.

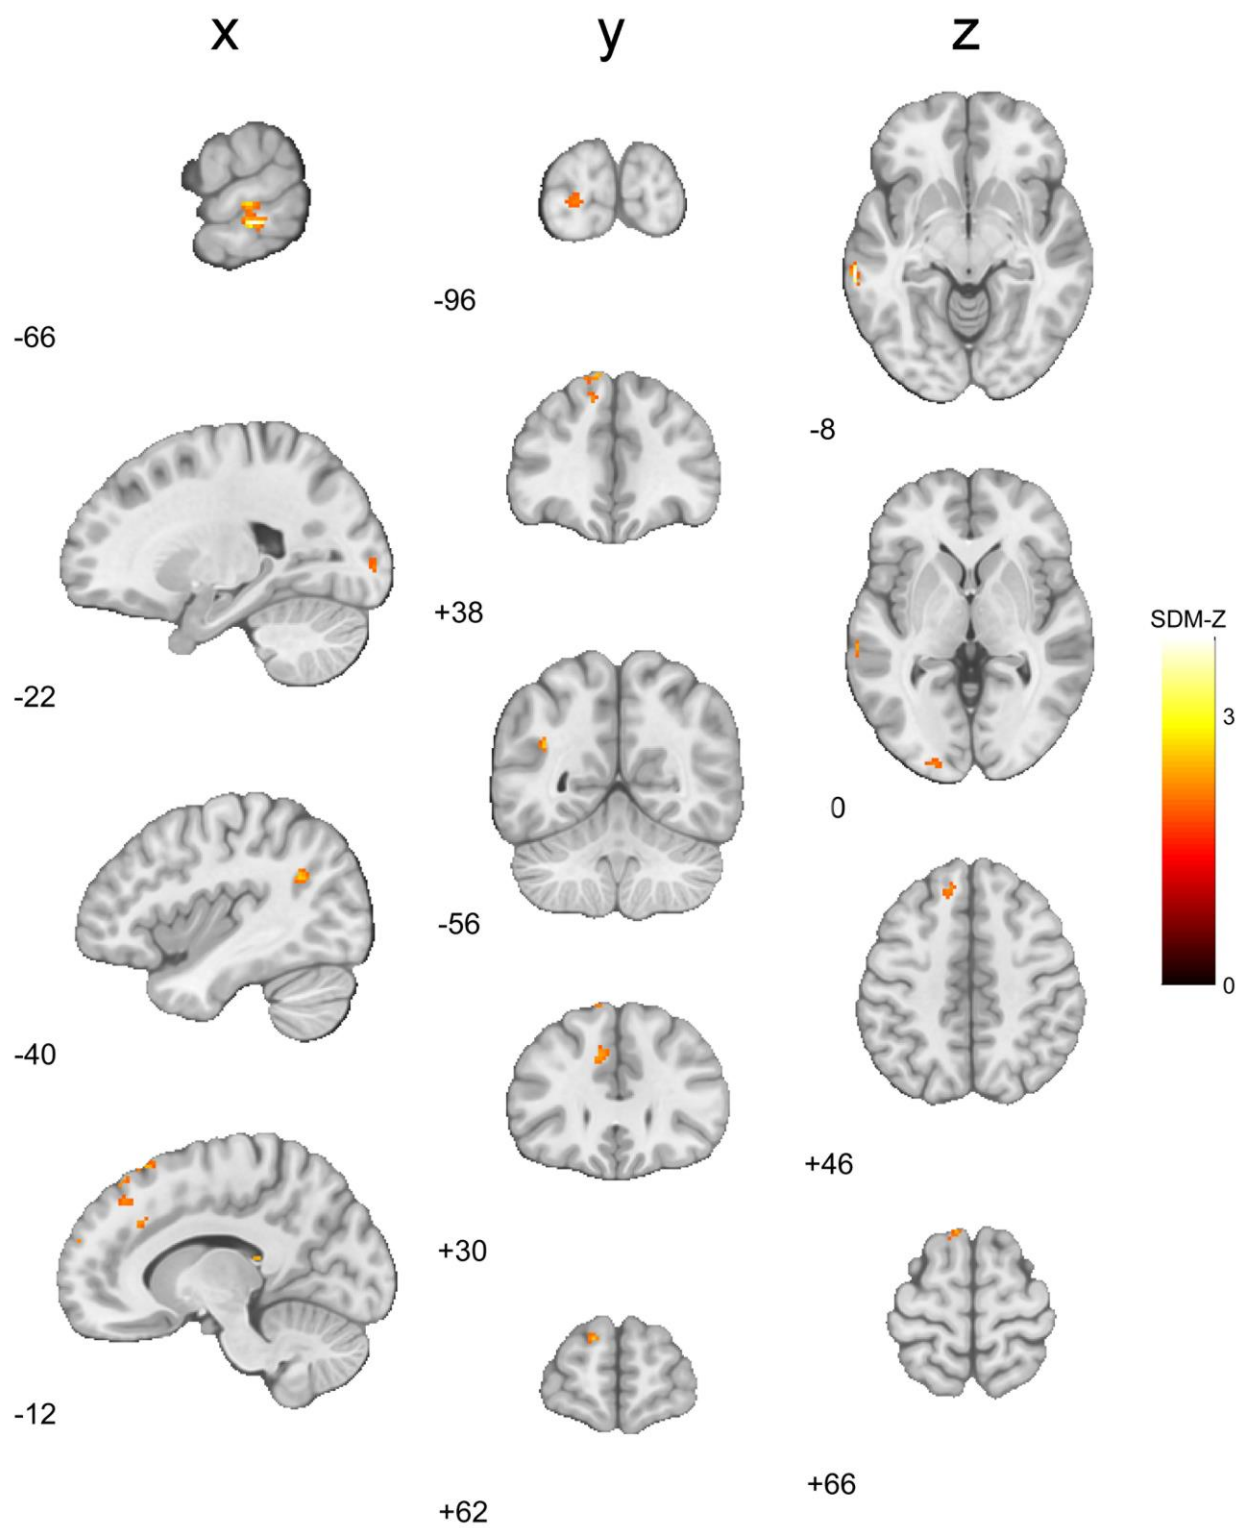

Supplement: Supplementary file [file media-1.pdf]
